# Supplementary material for: Minimizing the number of optimizations for efficient community dynamic flux balance analysis
Source: PubMed Central journal article supplement (PMC7546477; doi:10.1371/journal.pcbi.1007786), 2020-09-29
Supplement: pcbi.1007786.s001.pdf [file pcbi.1007786.s001.pdf]

## S1 Text: Existence of desired optimal basis.

James D. Brunner<sup>1\*</sup>, Nicholas Chia<sup>1</sup>

<sup>1</sup>Department of Surgery, Center for Individualized Medicine Microbiome Program, Mayo Clinic, Rochester, MN, USA

\* brunner.james@mayo.edu

**Lemma 1.** *For a linear program with the form given in Eq. (12) with a basic optimal solution  $\mathbf{w}$ , there exists a basic index set  $\mathcal{I}$  such that Eq. (18) holds and  $\dot{\mathbf{w}}$  is optimal over the possible choice of basic index sets for  $\mathbf{w}$ .*

*Proof.* For convenience, we now restate Eq. (12):

$$\left\{ \begin{array}{l} \max(\tilde{\phi} \cdot \tilde{\gamma}) \\ [\tilde{A} \quad I] \begin{bmatrix} \tilde{\phi} \\ \mathbf{s} \end{bmatrix} = \mathbf{c} \\ \tilde{\phi}_i \geq 0, s_i \geq 0 \end{array} \right\}$$

where we write  $(\tilde{\phi}, \mathbf{s}) = \mathbf{w}$ .

We note that there is a finite number of basic index sets for  $\mathbf{w}$ , and so we need only show that there exists  $\mathcal{I}$  such that Eq. (18) holds. Then, the existence of an optimal such  $\mathcal{I}$  follows trivially.

If  $\mathbf{w}$  is not degenerate, then the unique choice of basic index set  $\mathcal{I}$  satisfies Eq. (18). To see this, simply note that if  $\mathbf{w}$  is non-degenerate, then for every  $i \in \mathcal{I}$ ,  $w_i > 0$ . Thus, Eq. (18) only includes non-negativity constraints on  $\dot{w}_i$  if  $i \notin \mathcal{I}$ , and for any  $i \notin \mathcal{I}$ ,  $\dot{w}_i = 0$ . Thus, the non-negativity constraints are enforced. The equality constraints are enforced by the definition of  $\mathbf{w}_{\mathcal{I}}(\mathbf{a})$  given in Eq. (13), which implies that  $[\tilde{A} \quad I]\mathbf{w}_{\mathcal{I}}(\mathbf{a}) = \mathbf{a}$  for any vector  $\mathbf{a} \in \mathbb{R}^n$ .

In the case of a degenerate solution  $\mathbf{w}$ , we use the following procedure to choose a set of basic variables. Let  $\mathcal{J} \subset \{1, \dots, n\}$  be the indices of the  $n_1$  slack variables such that  $s_j = 0$  if  $j \in \mathcal{J}$  (recalling that each  $s_i$  is a component of the vector  $\mathbf{w}$ ). Then, let  $\tilde{A}_{\mathcal{J}}$  be the matrix with rows  $m_j$  of  $\tilde{A}$  for  $j \in \mathcal{J}$ . Next, let  $\mathcal{J}^*$  be the indices of the  $n_2$  non-slack variables such that  $\phi_j = 0$  and  $I_{\mathcal{J}^*}$  the corresponding rows of the identity matrix  $I$ . Notice that we now have that

$$M\tilde{\phi} = \begin{bmatrix} \tilde{A}_{\mathcal{J}} \\ -I_{\mathcal{J}^*} \end{bmatrix} \tilde{\phi} = \begin{bmatrix} \mathbf{c}_{\mathcal{J}} \\ \mathbf{0} \end{bmatrix}. \quad (1)$$

and that if  $w_j = 0$  then either  $j \in \mathcal{J}^*$  or  $w_j = s_k$  where  $k \in \mathcal{J}$  so that  $\mathbf{m}_k \cdot \tilde{\phi} = c_k$  (i.e.  $s_k$  is a slack variable and  $s_k = 0$ ). Notice that because Eq. (12) has a bounded solution, then we can assume without loss of generality that if  $M \in \mathbb{R}^{q \times r}$ , then  $\text{rank}(M) = r$  (i.e.  $M$  is full rank) because  $\mathbf{w}$  must satisfy at least  $r$  linearly independent constraints. If this is not the case, then the problem can be projected onto a lower dimensional subspace.

Consider the linear program

$$\left\{ \begin{array}{l} \max(\mathbf{y} \cdot \boldsymbol{\gamma}) \\ [M \quad I] \begin{bmatrix} \mathbf{y}_{\tilde{\phi}} \\ \mathbf{y}_{\mathbf{s}} \end{bmatrix} = \begin{bmatrix} \frac{d}{dt} \mathbf{c}_{\mathcal{J}} \\ \mathbf{0} \end{bmatrix} \\ y_j \geq 0 \end{array} \right\}. \quad (2)$$

Assume that there is some basic optimal solution to Eq. (2) with a basic index set  $\hat{\mathcal{I}}$  such that exactly  $r$  slack variables are non-basic, where again  $r = |\phi|$  is the rank of the matrix  $M$ . This implies that there are  $r$  linearly independent rows of  $M$  (which we index by  $\mathcal{J}^\dagger$ ) which form an invertible matrix  $\tilde{M}$  such that

$$\tilde{M}\mathbf{y}_{\tilde{\phi}} = \begin{bmatrix} \frac{d}{dt}\mathbf{c}_{\mathcal{J}^\dagger} \\ \mathbf{0} \end{bmatrix} \quad (3)$$

and we can then determine  $\mathbf{y}_s$  by

$$\mathbf{y}_s = \begin{bmatrix} \frac{d}{dt}\mathbf{c}_{\mathcal{J}} \\ \mathbf{0} \end{bmatrix} - M\mathbf{y}_{\tilde{\phi}} \quad (4)$$

and note that each  $(\mathbf{y}_s)_i \geq 0$ . We now rewrite  $\dot{\mathbf{w}} = (\dot{\mathbf{w}}_{\tilde{\phi}}, \dot{\mathbf{w}}_s)$  from Eq. (18) and define  $\dot{\mathbf{w}}_{\tilde{\phi}} = \mathbf{y}_{\tilde{\phi}}$  and

$$\dot{\mathbf{w}}_s = \frac{d}{dt}\mathbf{c} - M\dot{\mathbf{w}}_{\tilde{\phi}} \quad (5)$$

and conclude that this satisfies the constraints of Eq. (18). Next, we take  $\tilde{\phi}$  to be the unique solution to

$$\tilde{M}\tilde{\phi} = \begin{bmatrix} \mathbf{c}_{\mathcal{J}^\dagger} \\ \mathbf{0} \end{bmatrix} \quad (6)$$

and  $\mathbf{s} = \mathbf{c} - \tilde{A}\tilde{\phi}$ .

Finally, we take  $\mathcal{I} = (\hat{\mathcal{I}} \setminus \mathcal{J}^*) \cup \mathcal{J}^c$  and note that this basis set enforces exactly the same  $r$  linearly independent constraints as  $\tilde{M}^1$ .

We now prove that there is some basic optimal solution to Eq. (2) with a basic index set  $\hat{\mathcal{I}}$  such that exactly  $r$  slack variables are non-basic, where  $r$  is the rank of the matrix  $M$ .

First we note that for any basic optimal solution, if there are  $r^* > r$  slack variables which are non-basic, then there are  $r^*$  rows of  $B_{\hat{\mathcal{I}}}$  which are non-zero only in the columns of  $M$ . Therefore,  $B_{\hat{\mathcal{I}}}$  is not invertible. We can conclude that the number of non-basic slack variables is at most  $r$ .

Next, suppose  $\dot{\mathbf{w}}^*$  is a basic optimal solution with basis  $\mathcal{I}^*$  such that there are  $r^* < r$  slack variables which are non-basic.

We would like to assume that there are at least  $r$  slack variables  $s_k^*$  corresponding to  $r$  linearly independent constraints such that  $s_k^* = 0$ . Recall that  $\tilde{A}$  was formed with repeated (negated) columns in order write the problem in standard form (the non-negativity bounds of Eq. (12) are artificial). Therefore, we can find some vector  $\mathbf{x}$  in the kernel of the matrix formed by the rows of  $\tilde{A}$  corresponding to zero slacks which also has  $\mathbf{x} \cdot \boldsymbol{\gamma} = 0$ . We can therefore find a vector  $\mathbf{y}$  in the kernel of

$$\begin{bmatrix} \tilde{A}_{\mathcal{J}} & I & 0 \\ -I_{\mathcal{J}^*} & 0 & I \end{bmatrix}$$

which has  $y_k = 0$  if  $s_k = 0$  and  $y_j \neq 0$  if  $s_j \neq 0$  and  $s_j$  corresponds to a constraint that is not a linear combination of the constraints corresponding to the  $s_k = 0$ . There is at least one such constraint as long as the 0 slack variables correspond to constraints with span less than dimension  $r$ , and so we can take  $\dot{\mathbf{w}} + \lambda\mathbf{y}$  for some  $\lambda$  and so increase the number of non-zero slack variables. We can therefore assume without loss of generality that there are at least  $r$  slack variables  $s_k^*$  corresponding to  $r$  linearly independent constraints such that  $s_k^* = 0$ , as was desired.

<sup>1</sup>In practice, we may simply use  $\tilde{M}$  to find  $\tilde{\phi}$

We can finally choose some linearly independent set of  $r$  constraints which correspond to 0 slack variables, and call the matrix whose rows are these constraint vectors  $M^*$ . Now, because there are  $r^* < r$  non-slack basic variables, there is some non-slack, non-basic variable  $v_j$  such that the column  $m_j^*$  of  $M^*$  (and  $m_j$  of  $M$ ) is linearly independent from the columns corresponding to the  $r^*$  non-slack basic variables. We can conclude that if

$$B_{\mathcal{I}^*} \boldsymbol{\lambda} = m_j \tag{7}$$

then there is some  $\lambda_k \neq 0$  where  $k$  corresponds to the index of a slack variable with  $s_k = 0$ . We can remove  $k$  from the basic index set and add  $j$  without changing  $\boldsymbol{w}^*$ , and therefore preserving optimality and feasibility. We have then increased the number of non-basic slack variables, and we can repeat if necessary to form  $\hat{\mathcal{I}}$  with exactly  $r$  non-basic slack variables. □
